# Supplementary material
Source: PubMed Central journal article supplement (PMC6448584)
Supplement: NIHMS978744-supplement-Supplement_Table.pdf [file NIHMS978744-supplement-Supplement_Table.pdf]

**Supplemental Digital Contents Table 1. Univariable and multivariable analysis of predictors of blood stream infections following liver transplantation of younger and older age group**

**A. pre-operative variables <sup>a</sup>**

| Variables                         | Age ≤24 months          |                             |                         |                             | Age >24 months          |                             |                         |                             |
|-----------------------------------|-------------------------|-----------------------------|-------------------------|-----------------------------|-------------------------|-----------------------------|-------------------------|-----------------------------|
|                                   | OR (95%CI) <sup>b</sup> |                             | OR (95%CI) <sup>c</sup> |                             | OR (95%CI) <sup>b</sup> |                             | OR (95%CI) <sup>c</sup> |                             |
|                                   | Unadjusted              | <i>P</i> value <sup>b</sup> | Adjusted                | <i>P</i> value <sup>c</sup> | Unadjusted              | <i>P</i> value <sup>b</sup> | Adjusted                | <i>P</i> value <sup>c</sup> |
| Age/month follow this description | 0.87 (0.78-0.97)        | 0.006                       |                         |                             | 1.01 (1.00-1.02)        | 0.15                        |                         |                             |
| Body weight /kg                   | 0.78 (0.62-0.98)        | 0.03                        |                         |                             | 1.04 (0.99-1.08)        | 0.07                        |                         |                             |
| Gender, male                      | 0.86 (0.39-1.94)        | 0.84                        |                         |                             | 0.74 (0.26-2.13)        | 0.61                        |                         |                             |
| Underlying diseases               |                         |                             |                         |                             |                         |                             |                         |                             |
| biliary atresia                   | [reference]             |                             |                         |                             | [reference]             |                             |                         |                             |
| metabolic diseases                | 1.99 (0.71-5.61)        |                             |                         |                             | 0.56 (0.13-2.45)        |                             |                         |                             |
| acute liver failure               | 1.19 (0.43-3.32)        | 0.60                        |                         |                             | 2.40 (0.52-11.19)       | 0.66                        |                         |                             |
| liver fibrosis                    | NA                      |                             |                         |                             | 0.60 (0.11-3.34)        |                             |                         |                             |
| liver cirrhosis                   | 3.24 (0.42-24.70)       |                             |                         |                             | 1.00 (0.09-11.03)       |                             |                         |                             |
| vascular abnormalities            | 0.00 (0.00-0.00)        |                             |                         |                             | 0.75 (0.07-7.73)        |                             |                         |                             |
| hepatic tumor                     | 0.00 (0.00-0.00)        |                             |                         |                             | 0.00 (0.00-0.00)        |                             |                         |                             |
| Number of operation before LT     | 0.64 (0.39-1.05)        | 0.047                       | 0.66 (0.37-1.18)        | 0.161                       | 0.89 (0.54-1.47)        | 0.96                        |                         |                             |
| CMV serostatus                    |                         |                             |                         |                             |                         |                             |                         |                             |
| Donor +/ Recipient +              | [reference]             |                             |                         |                             | [reference]             |                             |                         |                             |
| Donor +/ Recipient –              | 2.00 (0.77-5.23)        | 0.30                        |                         |                             | 1.19 (0.36-3.87)        | 0.85                        |                         |                             |
| Donor –/ Recipient +              | 2.67 (0.86-8.27)        |                             |                         |                             | 1.78 (0.28-11.32)       |                             |                         |                             |
| Donor –/ Recipient –              | 1.33 (0.30-5.85)        |                             |                         |                             | 0.65 (0.12-3.46)        |                             |                         |                             |

|                              |                   |       |                  |       |                   |      |                  |      |
|------------------------------|-------------------|-------|------------------|-------|-------------------|------|------------------|------|
| Pre-operative status         |                   |       |                  |       |                   |      |                  |      |
| at home                      | [reference]       |       |                  |       | [reference]       |      |                  |      |
| hospitalized (general ward)  | 1.31 (0.14-12.43) | 0.62  |                  |       | 1.10 (0.33-3.71)  | 0.35 |                  |      |
| hospitalized (ICU)           | 2.00 (0.20-19.75) |       |                  |       | 2.75 (0.63-12.09) |      |                  |      |
| ABO compatibility            |                   |       |                  |       |                   |      |                  |      |
| Identical/compatible         | [reference]       | 0.21  | 1.67 (0.60-4.65) | 0.33  | [reference]       | 0.12 | 1.28 (0.19-8.70) | 0.8  |
| Incompatible                 | 1.95 (0.78-4.87)  |       |                  |       | 3.94 (0.73-21.38) |      |                  |      |
| Donor age (year)             | 1.00 (0.94-1.06)  | 0.68  | 1.00 (0.94-1.06) | 0.96  | 1.07 (0.98-1.17)  | 0.11 | 1.05 (0.95-1.17) | 0.33 |
| PELD/MELD score <sup>d</sup> | 1.06 (1.02-1.10)  | 0.002 | 1.04 (1.00-1.08) | 0.037 | 1.03 (0.98-1.08)  | 0.27 |                  |      |

Deleted: \*

### B intra and post operative variables <sup>a</sup>

| Variables                                             | Age ≤24 months          |                      |                         |                      | Age >24 months          |                      |                         |                      |
|-------------------------------------------------------|-------------------------|----------------------|-------------------------|----------------------|-------------------------|----------------------|-------------------------|----------------------|
|                                                       | OR (95%CI) <sup>b</sup> |                      | OR (95%CI) <sup>c</sup> |                      | OR (95%CI) <sup>b</sup> |                      | OR (95%CI) <sup>c</sup> |                      |
|                                                       | Unadjusted              | P value <sup>b</sup> | Adjusted                | P value <sup>c</sup> | Unadjusted              | P value <sup>b</sup> | Adjusted                | P value <sup>c</sup> |
| Reconstruction of the biliary duct                    |                         |                      |                         |                      |                         |                      |                         |                      |
| Roux-en Y                                             | [reference]             | 0.61                 |                         |                      | [reference]             | 0.69                 |                         |                      |
| choledococholedocostomy                               | 1.83 (0.29-11.48)       |                      |                         |                      | 1.58 (0.37-6.81)        |                      |                         |                      |
| Log-Operative time (min); median (IQR)                | 1.20 (0.24-6.10)        | 0.75                 |                         |                      | 12.36 (2.17-70.30)      | 0.008                |                         |                      |
| Log-blood volume loss during LT (ml/kg); median (IQR) | 1.75 (1.09-2.81)        | 0.02                 | 2.06 (1.15-3.69)        | 0.02                 | 2.01 (1.13-3.59)        | 0.04                 | 1.80 (0.93-3.47)        | 0.08                 |
| GRWR (%)                                              | 0.93 (0.52-1.67)        | 0.42                 |                         |                      | 0.29 (0.08-1.11)        | 0.05                 | 0.26 (0.05-1.22)        | 0.09                 |
| CIT (min)                                             | 1.00 (0.99-1.01)        | 0.55                 |                         |                      | 1.00 (1.00-1.01)        | 0.91                 |                         |                      |

|                               |                  |      |                  |      |                   |       |                   |       |
|-------------------------------|------------------|------|------------------|------|-------------------|-------|-------------------|-------|
| WIT (min)                     | 1.03 (0.99-1.07) | 0.10 |                  |      | 0.98 (0.92-1.05)  | 0.84  |                   |       |
| Positivity of CMV-Ag after LT | 1.29 (0.56-2.98) | 0.67 | 1.54 (0.56-4.20) | 0.40 | 5.56 (1.83-16.84) | 0.005 | 6.17 (1.74-21.87) | 0.005 |
| Acute Rejection               | 1.42 (0.64-3.15) | 0.42 |                  |      | 1.56 (0.55-4.44)  | 0.42  |                   |       |
| Biliary complication          | 1.67 (0.38-7.38) | 0.68 |                  |      | 2.59 (0.73-9.13)  | 0.15  |                   |       |

BSIs, blood stream infections; IQR, interquartile range; CMV, cytomegalovirus; ICU, intensive care unit; PELD, pediatric end-stage liver disease; MELD, model for end-stage liver disease; OR, odd ratio; GRWR, graft to recipient body weight ratio; CIT, cold ischemic time; WIT, warm ischemic time; LT, liver transplantation

a. Univariate (unadjusted) and multivariate (adjusted) ORs are presented.

b. P-value from the Fisher's exact test or Mann-Whitney nonparametric test; 95% confidence intervals are based on logistic regression.

c. P-value and 95% confidence intervals from multiple logistic regression. d. PELD/MELD score was calculated only cholestatic liver disease (42 in BSIs group and 122 in non-BSIs group)

Deleted: 1

Deleted: 3
