# Supplementary material
Source: PubMed Central journal article supplement (PMC6448584)

# Supplemental Figure 1

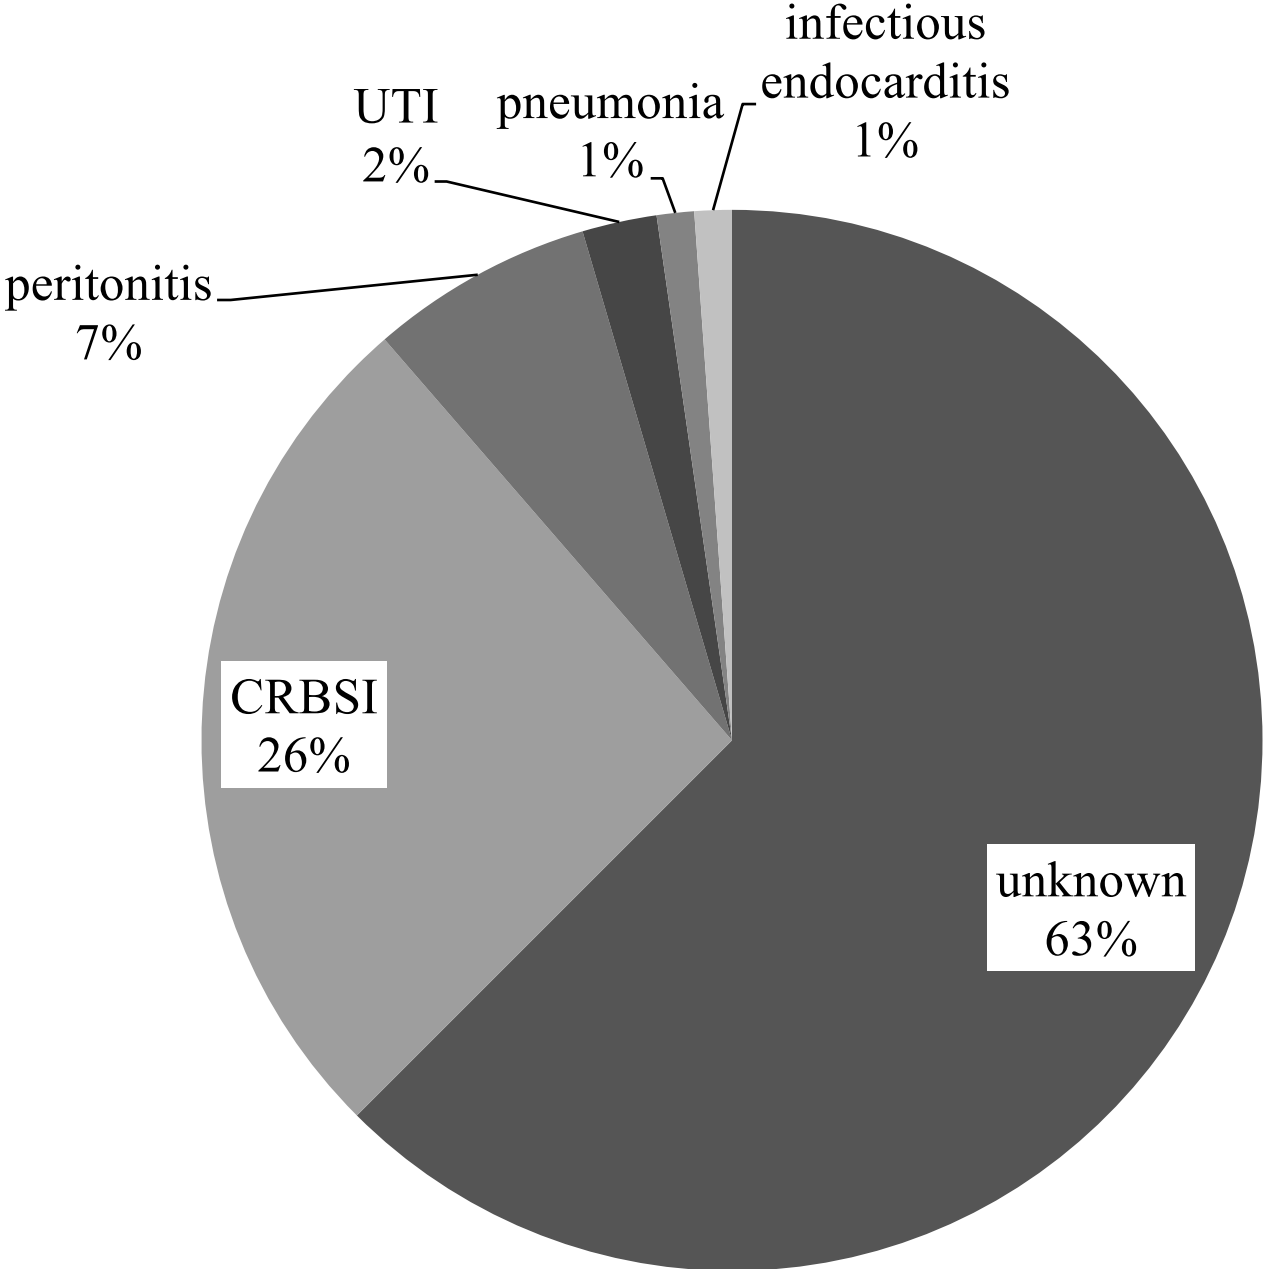

n = 88

Supplement: NIHMS978744-supplement-Supplement_Figure.pdf [file NIHMS978744-supplement-Supplement_Figure.pdf]
